# Supplementary material for: What matters to women during childbirth: A systematic qualitative review
Source: PLoS One. 2018 Apr 17;13(4):e0194906. doi: 10.1371/journal.pone.0194906 (PMC5903648; doi:10.1371/journal.pone.0194906)
Supplement: S1 Appendix — (XLSX) [file pone.0194906.s001.xlsx]

## Sheet: Sheet1
Authors	Title	Date	Country	Resource	Qualitative	Parity	Natal Status	Context	Clear Aims	Lit Review	Theory and Design clear and appropriate	Sampling strategy explained	Data Collection explained	Analysis explained	Findings reflect data	Ethics	Reflexivity	Relevance	Quality Rating
Basso & Monticelli	Expectations of pregnant women and partners concerning their participation in humanized births	2010	Brazil	Upper Middle	Y	Not listed	pre	Urban setting	Yes	Brief and based on authors assumptions	Problematizing methodology? Developed in the groups and included in the context of a study on Convergent Care	Unclear - appears to be volunteers attending ANC classes which also provide a settting for the intervention	Unclear - appears to be transcripts from the ANC classes / workshops	Limited - identification of key concepts from worksops developed further by analysing transcripts	Yes - plenty of quotes to support	Yes	No - though authors do state their bias without being reflexive	No - Not put into context	D
Ferreira et al	Expectation of pregnant women in relation to childbirth	2013	Brazil	Upper Middle	Y	Not listed	pre?	Urban setting	Yes	Brief and simple	Simple and descriptive	No - Random?	Very simple explanation	Yes - Thematic based on Minayo	Yes - supportive quotes to highlight themes	Yes	No	Very limited	D
Marin et al	Expectations and feelings of single mothers on the birth experience	2009	Brazil	Upper Middle	Y	P	pre & post	Urban setting	Yes	Good - extensive	Limited theory and poorly explained design	Yes - as part of a lonitudinal study	Yes - Reasonably detailed	Limited - content analysis	Yes - supportive quotes	No	No	Yes - in the context of single mothers	C+
Pinheiro & Bittar	Expectations, perceptions and experiences of normal birth: report of a group of women	2013	Brazil	Upper Middle	Y	P & M	pre	Urban setting	Yes	Good - extensive	Limited theory	No details - Random?	Confusing - some interviews prenatal, some post interspersed with some observational work	Limited - discourse analysis but no details	Yes - supportive quotes	Yes	No	Yes - partly, within a Brazilian context	C+
Aune et al	Promoting a normal birth and a positive birth experience — Norwegian women's perspectives	2015	Norway	High	Y	P	post	Urban setting	Yes	Good - extensive	Yes - Good description based on Antonovsky	Yes - selective sampling based on women who self identified as having a positive birth experience	Yes - in depth interviews with 12 women	Yes - based on Malterud	Yes - phenomenological descriptors	Yes	No	Yes - but limited to women who had a positive birth experience	B+
Callister et al	Giving Birth: the voices of Ecuadorian women	2010	Ecuador	Middle	Y	P & M	post	Urban setting	Yes	Good - extensive	Yes - based on ethnographic principles	Unclear - appears to be random on the post natal ward	Yes - in depth interviews framed by observation	Limited - thematic analysis from transcript data	Yes - supportive quotes	Yes	No?	Yes - focus on Ecuador with implications for Ecuadorian women living in other countries	B
Brodrick	Exploring women’s pre-birth expectations of labour and the role of the midwife	2008	UK	High	Y	P	pre	Urban setting	Yes - pre birth expectations AND role of the midwife	Good - extensive	Limited theory	Random - based on meeting inclusion criteria	Yes - in depth interviews but no details of saturation	Yes - based on Attride-Stirling approach	Yes - supportive quotes	? - discussed but no approval details mentioned	Yes - role of the researcher in data collection discussed	Yes - reasonably broad discussion	B
Callister, Holt & Kuhre	Giving Birth down under: the voices of Australian women	2010	Australia	High	Y	P & M	post	Urban setting	Yes - mainly focused on experiences	Very good - within an Australian context	Yes - qualiataive descriptive	Yes - convenience	Yes - in depth interviews with 17 women	Yes - including roles of authors	Yes- supportive quotes	Yes	No	Yes - nut largely limited to an Australian context	B+
Callister, Eads & Diel	Perceptions of Giving Birth and Adherence to Cultural Practices in Chinese Women	2011	China & USA	High	Y	P & M	post	Urban settings in China, Taiwan and the US	Yes	Good - focused on Chinese socio-cultural practices around birth	Limited theory and design	Yes - snowball sampling	Yes - in depth interviews until data saturation	Limited - based on a previous guide and appears to be simple thematic analysis	Yes - supportive quotes	Yes	No	Yes - limitations discussed as well as scope of study for Chinese populations in other contexts	B
Chuahorm et al	Fear and Suffering During Childbirth Among Thai Women	2007	Thailand	Upper Middle	Y	P	post	Semi Urban Central Province	Yes	Adequate - largely in a Thai context	Yes - largely based on grounded theory	Yes - purposive initially followed by theoretical sampling based on participant characteristics	Yes - according to grounded theory principles	Yes - coding and comparison to build categories	Yes - supportive quotes	Yes	No	Yes -detailed and including implications but no details of limitations	B
Corbett & Callister	Giving Birth: the voices of women in Tamil Nadu, India	2012	India	Lower Middle	Y	P & M	post	Rural	Yes	Very good - extensive and contextually detailed	Yes - but limited information on underpinning theory. Appears to be ethnographic	Yes - initially convenience in post partum unit followed by snowball sampling	Yes - recruitment continued until theoretical saturation	Partly? - a little confusing - generation of themes from transcription and field notes (simple descriptive? Ethnographic?), also incorporating elements of phenomenology, 'what is this woman saying?'	Yes - supportive quotes	Yes	No	Yes - covers virtually all elements of relevance	B+
Craig & Kabylbekova	Culture and Maternity Care in Kazakhstan: What New Mothers Expected	2015	Kazakhstan	Upper Middle	Y	P & M	post	Urban setting	Yes	Very good - extensive and contextually detailed	Simple descriptive giving detail on the rationale behind using focus groups but nothing else	Yes - random to begin with and then snowballocus groups	Yes - two focus groups but limited details on data requirements, saturation, etc	Yes- based on grounded theory with open and axial coding	Yes - supportive quotes	Yes	No	Yes - covers context, limitations and wider implications	B-
D'ambruoso, Abbey & Hussein	Please understand when I cry out in pain: women's accounts of maternity services during labour and delivery in Ghana maternity services during labour and delivery in Ghana	2005	Ghana	Lower Middle	Y	P & M	post	Semi-Urban - outskirts of ACCra	Yes - as part of a wider study	Very good - extensive and contextually detailed	Yes - qualitative and descriptive using focus groups and latterly interviews	Yes - opportunistic as part on a wider study	Yes - two focus groups and 21 interviews	Limited - concurrent thematic analysis from transcript data - until thematic saturation	Yes - supportive quotes	Yes	No - though researcher influence acknowledged	Yes - excellent discussion of limitations, implications, methodological issues and contextual nuances	B
Fenwick et al	The childbirth expectations of a self selected cohort of Western Australian women	2005	Australia	High	Y	P & M	pre & post	Range of settings from urban to rural	Yes	Good - extensive	Yes - explorative descriptive but not much on theory	Yes - random based on response to a newspaper advert	Yes - telephone interviews with a self selecting group	Yes - thematic based on constant comparison	Yes - supportive quotes	Yes	No	Yes - covers context, limitations and wider implications	A-
Gibbins & Thomson	Women's expectations and experiences of childbirth	2001	UK	High	Y	P	pre & post	Urban setting	Yes	Very good - extensive and detailed	Yes - Phenomenology using Husserlian approach	Yes - purposive in accord with phenomenological approach	Yes - pre and post natal interviews with 8 women	Yes - detailed and in accord with method used	Yes - supportive quotes throughout	Yes	Yes - bracketing and the role of the researcher discussed though the actual views of the researcher are not present	Yes - covers limitations, implications and context.	A-
Gomi - article in JAPANESE	Women's delivery care needs in rural Bangladesh: Recommendations for skilled birth attendants Recommendations for skilled birth attendants	2013	Bangladesh	Lower Middle	Y	P & M	post	Rural	Yes	Adequate	Yes - qualiataive descriptive	Unclear	Yes - in depth interviews with 8 women	Yes - thematic based on constant comparison	Yes - supportive quotes	Yes	No	Unclear - article translated from Japanese	C
Halldorsdottir & Karlsdottir	Journeying through labour and delivery: perceptions of women who have given birth	1996	Iceland	High	Y	P & M	post	Urban setting	Yes	Very good - extensive and detailed	Yes - loosely based on phenomenology	Unclear - 'through a network of colleages'	Unclear - single interviews with 14 women ranging in age from 23 - 42. Limited details on approach used	Yes - coding of transcripts and constant comparison - loosely based on phenomenology	Yes - supportive quotes	Yes	No - mentioned but not discussed	Yes - covers context, limitations and implications	B-
Hauck et al	The influence of childbirth expectations on Western Australian women's perceptions of their birth experience	2007	Australia	High	Y	P & M	pre & post	Range of settings from urban to rural	Yes - addressing a number of questions from previous research (see 15 Fenwick et al)	Good - extensive	Yes - explorative and descriptive	Yes - Purposive sampling with women from phase 1 of the study (see 15)	Yes - in depth interviews with 14 women who were asked to provide detailed comments on the information they had given in phase 1	Yes - based on grounded theory with constant comparison and coding using pre-determined categories	Yes - supportive quotes	Yes	No	Yes - covers implications in detail but less acknowledgement of context and limitations	B+
Highsmith	Primiparas' expectations of childibirth: The impact of consciousness	2006	USA	High	Y	P	pre & post	Urban setting	? - broadly to explore women's experiences and expectations of childbirth	Very good - extensive and detialed	Yes - excellent discussion of theory and approach including use of drawing to illustrate the 'ideal birth'	No details other than 8 women were included	Yes - in depth pre and post natal interviews with each participant plus pre-natal drawings to illustrate ideal birth	Yes - largely based on phenomenological approach	Yes - including publication of women's pre-natal drawings	Not discussed	Yes	Yes - encompassing research and literature from the fields of art therapy, quantum physics and psychology	B+
Kaphle et al	Childbirth traditions and cultural perceptions of safety in Nepal: Critical spaces to ensure the survival of mothers and newborns in remote mountain villages	2013	Nepal	Low	Y	P & M	pre & post	Rural	Yes	Good - mainly within cultural context	Yes - social constructionist incorporating theories on oppression and feminism	Yes - purposive sample of a variety of participants in a remote location in rural Nepal	Yes - in depth interviews and accompanying field notes	Yes - simple coding of data followed by thematic analysis	Yes - supported by exteensive quotes	Yes	Yes - 'bracketing' of interviewers preconceptions and beliefs	Yes - but no discussion of limitations and question marks about the generalisability about such contextually nuanced findings	A-
Lundgren	Swedish women's experience of childbirth 2 years after birth	2005	Sweden	High	Y	P & M	post	Urban setting	Yes	Adequate	Yes - phenomenological accounts of women's chidbirth experiences	Unclear - appears to be a radomly selected group from a purposive sample? Participants may have been involved via another study	Limited - single in depth interviews	Yes - but limited explanation of how data from the individual interview transcripts was merged	Yes - plenty of quotes to support themes	Yes	? - bracketing explained in theory but no mention of author views	Yes - covers most aspects of relevance in a rich discussion	B-
Maier	Women's worries about childbirth: making safe choices	2010	Australia	High	Y	P & M	pre	Urban setting	Yes	Adequate	Yes - from a feminist perspective informed by author experiences	Unclear - randomly recruited at an antenatal clinic?	Unclear - 27 in depth interviews but no details on data saturation, etc;	No - no details given and no clear identification of coding or themes	Unclear - plenty of quotes but listed in a rather arbitrary fashion	Yes	No - not discussed	Yes - covers most aspects pertaining to relevance	C+
Malacrida & Boulton	The best laid plans? women's choices, expectations and experiences in childbirth	2014	Canada	High	Y	P & M & N	pre & post	Largely set in urban location	Yes	Very good - extensive and detailed	Yes - qualitative design informed by feminist perspective, Foucault and technocratic theories	Yes - variety of methods used including e-amail, adverts and snowball sampling	Unclear - 21 in depth interviews conducted post-anatally as part of a wider ethnographic study. Unclear whether women were also interviewed antenatally and whether this data is included. No details on data saturation	Yes - based on coding of transcripts, generation of themes and iterative discussions between authors	Yes - rich and detailed findings with clear themes supported by quotes	Yes	No	Yes - extensive exploration of relevance incorporating critical feminist theory	B+
Malacrida & Boulton	Women's perceptions of childbirth choices	2012	Canada	High	Y	P & M	post	Urban setting	Yes - a range of aims with 2 different groups of women (interviewed antenatally and postnatally)	Very good - extensive and detailed	Yes - social constructionism from a feminist perspective	Yes - brief details incorporating random (via e-mail and adverts) and snowball	Yes - in depth interviews with prenatal women about their expectations of childbirth and further interviews with mothers (different group) about their actual experiences	Limited - a form of thematic analysis	Yes - plenty of supportive quotes	Yes	No	Yes - partly	B
Martin, Bulmer & Pettker	Childbirth Expectations and Sources of Information Among Low- and Moderate- Income NuUiparous Pregnant Women	2013	USA	High	Y	P	pre	Urban setting	Yes	Adequate	Yes - phenomenological drawing on Husserlian approach to 'lived experinece'	Yes - non probability purposive sampling at an antenatal clinic with predefined inclusion criteria	Unclear - semi structured interviews with 7 participants not in keeping with phenomenological methodology	Yes - detailed description of coding and identifiaction of themes	Yes - plenty of supportive quotes	Yes	Yes	Yes - covers context, limitations and implications	B
Melender	What Constitutes a Good Childbirth? A Qualitative Study of Pregnant Finnish Women	2006	Finland	High	Y	P & M	pre	Urban and rural	Yes	Very good - extensive and detailed	Yes - descriptive, based on content analysis though little description of theory	Yes - purposive sampling in rural and urban locations with low risk and high risk women	Yes - in depth interviews with 24 women	Yes - a form of content analysis including coding of data, categorization and constsnt comparison	Yes - clear presentation of classification system used and a few supportive quotes	Yes	Yes - partial	Yes - covers context, limitations and implications	A-
Moore	Multicultural Differences in Women’s Expectations of Birth	2016	Global review	Mixed	Y (qualitative and quantitative)	Mixed	Mixed	Mixed settings	Yes? - not explicit - within the context of a review on expectations of birth	Brief and simple	Unclear - very descriptive and no indication of how quantitative and qualitative data were interpreted and/or synthesized	Unclear - poor description of search strategy and inclusion/exclusion criteria	Unclear - descriptive with no indication of how data was extacted or whether any quality appraisal was conducted	No - no details of any analytic techniques used	Unclear - Findings organised into broad themes/headings with no indication of how these were derived	N/A	No	Yes - reasonably detailed discussion of potential issues and implications	D
Murray	Childbirth in santiago de chile: Stratification, intervention, and child centeredness.	2012	Chile	High	Y	P & M	pre & post	Urban setting	Yes - framed in an anthropological context	Good - largely within a South American context	Unclear - appears to be an ethnographic study utilizing multiple visits, interviews and field notes	Unclear - researcher worked with 16 informants over a 1 year period	Unclear - appears to be broadly in accord with ethnography but limited details	Unclear - reported in a descriptive manner having divided the women into 3 groups based broadly on socio-economic circumstances	Yes - findings organised chronologically according to progress of pregnancy and birth and include plenty of supporting quotes	Not discussed	No	Yes - covers context, limitations and implications in good level of detail	C+
Nakano et al	Childbirth experience according to a group of brazilian primiparas.	2012	Brazil	Upper Middle	Y	P	post	Urban setting	Yes	Adequate	Yes - Based on social constructionist principles	Yes - convenience sample of 20 women recriuted 1 month post-natally when they attended a vaccination clinic	Yes - in depth interviews analysed iteratively until data saturation achieved	Yes - basic thematic analysis	Yes - supportive quotes in accord with themes	Yes	? - view of the authors mentioned briefly. border ofthebiologicalaspectsdominatingtheparturition process toaccessthemultidimensionalityinvolvingbirth	Yes - explored within a Brazilian context but little mention of study limitations/weaknesses	B
Okwako & Symon	Women's expectations and experiences of childbirth in a Kenyan public hospital	2014	Kenya	Lower Middle	Y	P & M	pre & post	Urban setting	Yes	Adequate	Yes - 2 stage qualiatative design (pre & post natal) though little detail on theory (loosely based on phenomenological approach)	Yes - convenience sample at an antenatal clinic	Yes - 2 in depth interviews with 7 women (pre & post natal)	Yes - interpretive phenomenological analysis generating themes and sub themes develpoed iteratively between the 2 authors independently	Yes - plently of quotes to support themes	Yes	No	Yes - covers context, limitations and implications	B+
Proctor	What determines quality in maternity care? comparing the perceptions of childbearing women and midwives	1998	UK	High	Y	P & M	pre & post	Urban setting	Yes - comparison of pregnat women and midwives r.r. perception of childbirth	Adequate	Limited theory - more an explanation of the use of focus groups	Limited detail - maximum varaition sampling including 33 women (19 pre and 14 post natal)and 47 staff members	Unclear - author mentions focus groups AND interviews but no details of how many, group sizes, etc; No information on data saturation	Yes - loosely based on thematic analysis with the generation of codes from the transcripts. Separated into women and staff	Unclear - categories well defined but limited supporting quotes	Yes	No	Yes - partly covers implications and recommendation but not informed by context or limitations	C
Raven et al	The quality of childbirth care in China: women’s voices: a qualitative study	2015	China	Upper Middle	Y	P & M	post	Rural	Yes	Adequate	Limited theory - broad qualitative design utilizing interviews and FGD,S	Yes - purposive sampling at a variety of hospitals but no details on how women were recruited	Yes - interviews and FGD's using a topic guide but details limited	Unclear - based on coding and development of themes using a framework but no details on data saturation or precise method used	Yes - findings illuminated by pertinent quotes	Yes	No	Yes - covers context, implications and limitations	B-
Regmi & Madison	). Contemporary childbirth practices in nepal: Improving outcomes	2009	Nepal	Low	Y	P & M?	post	Rural	Yes	Good - mainly within cultural context	Limited theory and very brief explanation of design	Unclear - Described as purposive but no details of recruitment or strategy	Yes - interviews and focus groups	Unclear - described as open, axial & selective coding based on grounded theory but no details of iteration, data saturation or how themes emerged	Yes - Supportive quotes to highlight themes	Yes	No	Yes - reasonably detailed and contextually framed but limitations not explored	C+
Rilby et al	A qualitative study of women's feelings about future childbirth: Dread and delight	2012	Sweden	High	Y	P & M	post (f)	Urban	Yes - in response to an open ended question on a questionnaire	Brief and simple	Limited theory - based on responses to an open ended survey question - 'Please describe your feelings when you think about giving birth in the future'?	Yes - follow up to a larger survey based study using prospective sampling	Yes - narrative response to a survey question	Yes - qualitative content analysis (appropriate for this type of data) of manifest and latent data	Yes - simplistic themes supported by quotes	Yes	No	Yes - covers impllications but little exploration of context (given the nature of the data) or limitations	B-
Sercekus & Okumus	Fears associated with childbirth among nulliparous women in turkey.	2009	Turkey	Upper Middle	Y	N	pre	Urban setting	Yes - framed by chilbirth fears in nuliiparous women	Brief and simple	Limited theory - descriptive qualitative research	Yes - purposive sample of women attending an outpatient clinic	Yes - interviews with 19 women - recruitment continued until data saturation	Yes - content analysis including coding and categorization of data	Yes - themes underpinned with supporting qoutes	Yes	No	Yes - covers context and implications but no detail on limitations	B-
Sharma, Christenssen & Johansson	The transition of childbirth practices among tribal women in Gujarat, India: A grounded theory approach	2012	India	Lower Middle	Y	P & M & N	pre & post	Rural	Yes	Good - mainly within the context of national and local maternity policy	Yes - grounded theory approach using focus groups with women plus interviews with stakeholders as well as field notes & observations	Yes - largely in accord with grounded theory approach though unclear how women were	Yes - a combination of FGD's, interviews, observations and field notes including FGD's with 85 women (childless, pregnant and mothers)	Yes - in accord with grounded theory	Yes - detailed and comprehensive with quotes to support constructs and theoretical development	Yes	No	Yes - detailed discussion covering context and implications but no detail on limitations	A-
Wilkinson & Callister	Giving birth: The voices of ghanaian women	2010	Ghana	Lower Middle	Y	P & M	post	Rural	Yes	Good - largely within a Ghanian context	Yes - ethnographic informed by interviews, observations and field notes using health belief model as an underpinning theory	Yes - 24 women selected randomly at clinic then snowball sampling to women in outlying villages	Yes - in depth interviews contextualized by observations & field notes	Yes - in accord with Spradley including iterative coding of transcripts and thematic development	Yes - detailed and contextually rich with supporting quotes	Yes	No	Yes - partly covers implications and recommendations but not informed by context or limitations	A-
Dias & Deslandes	Patients' expectations regarding childbirth care at a public maternity hospital in Rio de Janeiro, Brazil: challenges for the humanization of obstetric care	2006	Brazil	Upper Middle	Y	M	pre	Urban setting	Yes - within the context of a 'humanization of childbirth' policy advocated by the Brazilian government	Adequate	Limited theory - basic qualitative research supported by ethnographic data	Unclear - appears to be purposive sample of multipara's at a prenatal clinic	Yes - indepth interviews with 22 women supported by ethnographic observations	Unclear - appears to be based on an initial framework supported by themes generated from the transcripts and triangulated with ethnographic observations & notes	Yes - rich and detailed thematic descriptors with supporting quotes	No	No	Yes - implications and context covered but not much on limitations	C+
Bravo, Uribe & Contreras	Perceived care during the process of childbirth: the view of mothers	2008	Chile	High	Y	Mixed	Mixed	Mixed settings	Yes - within the context of a literature review	Brief and simple	Limited theory - basic literature search	Unclear - limited explanation of search strategy and no indication of exclusion/inclusion criteria	Limited - brief comment on study limitations but no details on how data was extracted	No - no details of how studies were analysed	Unclear	N/A	No	Limited	D
STUDIES EXCLUDED AFTER QA

## Sheet: Sheet2
Paper	Title	Date	Country	Theme 1	Theme 2	Theme 3	Theme 4	Theme 5	Theme 6	Theme 7	Theme 8	Theme 9	Theme 10	Theme 11	Theme 12
Marin et al	Expectations and feelings of single mothers on the birth experience	2009	Brazil	Expect to give birth to a healthy baby	Have a fear of childbirth	Negative expectations influenced by friends and family	Fear of being alone	Expect to feel calm during labour & birth	Scared of loosing control	Fear of something bad happening to the baby	Want to have a normal birth (no c.s.)	Belief in better recovery post-natally if brth is normal
Pinheiro & Bittar	Expectations, perceptions and experiences of normal birth: report of a group of women	2013	Brazil	Belief in a normal birth (without medical intervention)	Belief in better recovery post-natally if birth is normal	Expect to have a caesarean section	Have a fear of labour and birth	Expect to have partner present to offer support during labour & birth	Expect to be alone	Belief in God's will	Positive influence of caring and attentive health professionals
Aune et al	Promoting a normal birth and a positive birth experience — Norwegian women's perspectives	2015	Norway	Belief in a safe environment	Expect childbirth to be unpredictable	Expect to not be alone - for feelings of safety and reassurance	Importance of family support - parents and partner	Expectations informed by family & friends	Belief in a normal birth (without medical intervention)	Have faith in their own bodies	Expect birth to be a positive and simple experience	Value difficult life experiences as a way to mitigate against potential fear of childbirth
Callister et al	Giving Birth: the voices of Ecuadrian women	2010	Ecuador	Belief in pain as a sacrifice to be expected and endured for the greater joy of having a baby	Belief in a healthy pre-natal lifestyle as preparation for birth	Belief in birth as a spiritual experience	Want to give birth to a healthy baby	Expect to hand over control to doctors	Expectations informed by mother
Brodrick	Exploring women’s pre-birth expectations of labour and the role of the midwife	2008	UK	Belief in a normal birth (without medical intervention)	Expect to use non-pharmacological approaches to cope with pain	Expect childbirth to be unpredictable	Expect to 'go with the flow'	Belief in the hospital as the best place to give birth (safety and security)	Faith in the health professionals to do what's best (passivity)	Fear of the unknown	Expect partner to be present and supportive	Expect midwife to provide reassurance rather than support	Expect midwife to be popping in and out (being unattentive)
Callister, Holt & Kuhre	Giving Birth down under: the voices of Australian women	2010	Australia	Expect to have control over decision making	Belief in birth as a natural process	Belief in a spiritual dimension to birth	Expect labour & birth to be a slow process - surprise when it isn't	Expect to give birth to a healthy baby	Don't expect birth to be traumatic	Unprepared for the intensity of the pain
Callister, Eads & Diel	Perceptions of Giving Birth and Adherence to Cultural Practices in Chinese Women	2011	China & USA	Expect labour & birth to be a slow process - surprise when it isn't	Expectations informed by family & friends (especially mother)	Expectatations informed by cultural traditions	Importance of family support - parents and partner	Expecatation that staff will understand and respect different cultural practices
Chuahorm et al	Fear and Suffering During Childbirth Among Thai Women	2007	Thailand	Have a fear of childbirth	Fear of giving birth to an unhealthy or malformed baby	Want to give birth to a healthy baby	Belief in better post natal recovery if brth is normal	Expect birth to be very painful	Fear of being left alone	Fear of hospital staff being uncaring or abusive	Expect hospital staff to be supportive and available
Corbett & Callister	Giving Birth: the voices of women in Tamil Nadu, India	2012	India	Belief in a healthy pre-natal lifestyle as preparation for birth	Fear of the unknown	Have a fear of childbirth	Expect to uphold cultural traditions during labour and birth	Value being given information and support during labour and birth
Craig & Kabylbekova	Culture and Maternity Care in Kazakhstan: What New Mothers Expected	2015	Kazakhstan	Multipara's less fearful about birth comapred to primipara's	Fear of the unknown	Value of having a birth companion to provide practical and emotional support	Not expecting to be alone	Value presence of a companion for reassurance about decisions and actions in the unfamiliar hospital environment	Expect to practice birthing techniques learned prenatally
D'ambruoso, Abbey & Hussein	Please understand when I cry out in pain: women's accounts of maternity services during labour and delivery in Ghana maternity services during labour and delivery in Ghana	2005	Ghana	Want to give birth to a healthy baby	Expect to be treated with care and respect	Expect staff to be kind, encouraging, supportive and patient	Do not expect staff to be rude, insensitive and lacking in empathy	Expect facility to have an ambulance in place in case of emergency
Fenwick et al	The childbirth expectations of a self selected cohort of Western Australian women	2005	Australia	Belief in a normal birth (without medical intervention)	Belief in birth as a natural process	Expect to be 'in control'	Ability to make choices	Need for others to be sensitive and caring	Expect to 'go with the flow'	Expect to give birth to a healthy baby	Expect birth to be a positive and simple experience	Expect birth to be a scary and painful experience	Expectations informed by media	Expectations informed by family & friends
Gibbins & Thomson	Women's expectations and experiences of childbirth	2001	UK	Want to have a quick labour	Expect labour and birth to be painful	Fear of the unknown	Want to give birth to a healthy baby	Want to keep an open mind about pain relief	Expect partners to be the main source of support	Want to have a familiar midwife looking after them - someone thay have met before	Expect to feel in control - informed and involved in decisions	Want to feel reassurance from the midwife
Gomi - article in JAPANESE	Women's delivery care needs in rural Bangladesh: Recommendations for skilled birth attendants Recommendations for skilled birth attendants	2013	Bangladesh	Want to give birth to a healthy baby	Want a relaxed and supportive environment	Importance of family support - parents and partner	Expecatation that staff will understand and respect different cultural practices	Expect staff to be skilled and technically competent
Halldorsdottir & Karlsdottir	Journeying through labour and delivery: perceptions of women who have given birth	1996	Iceland	Reassurance and confidence from previous births (multipara's)	Don't really know what to expect (primipara's)	Expect to be able to cope with pain	Expected pain to be worse than it was	Understanding that women are in a very sensitive and vulnerable position during labour	Preference for a women centred midwife rather than one focused on tasks and equipment	Need to feel a sense of control	Desire for a caring, understanding midwife	Need to be involved in decision making	Need to feel safe and secure (reassurance from the midwife)	Need to have a supportive partner present
Hauck et al	The influence of childbirth expectations on Western Australian women's perceptions of their birth experience	2007	Australia	Expect to 'go with the flow' (led to positive birth experience)	Expect to have the ability to make choices	Want to give birth to a healthy baby (not taken for granted)	Belief that birth is frightening and painful	Belief that birth is a 'medical event'	Need to be supported by a caring midwife	Belief in a normal birth (without medical intervention)	Need to feel a sense of control	Belief that birth is simple and straightforward	Need to be supported by a technically competent midwife
Highsmith	Primiparas' expectations of childibirth: The impact of consciousness	2006	USA	Belief in a normal birth (without medical intervention)	Fear of giving birth to an unhealthy or malformed baby	Expect to experience a lot of pain	Expect to have resources to support labour (Birth ball, pool, rocking chair,etc;)	Importance of having family members present as support	Want a nice smelling soom with quiet music	Expect to hold the baby immediately after birth	Expectations partially informed by media represenataions of birth - painful, on a bed, in a hospital	Sub-conscious depictions show women expect labour and birth to be a transcendental experience
Kaphle et al	Childbirth traditions and cultural perceptions of safety in Nepal: Critical spaces to ensure the survival of mothers and newborns in remote mountain villages	2013	Nepal	Expectation of birth strongly influenced by traditional & cultural beliefs	Place of birth (barn) influenced by cultural association with safety	Expectations influenced by mother-in-law	Belief that birth can be 'polluting' and should not occur in the house	Belief that birth is a normal event	Want to give birth to a healthy baby but accept that this is not a right	Belief in God's will	Fear and anxiety assocaited with giving birth to an unhealthy or malformed baby	Belief in TBA'S to facilitate childbirth
Lundgren	Swedish women's experience of childbirth 2 years after birth	2005	Sweden	Expect to 'go with the flow' i.e. the birth process, guided by bodily signals	Want to 'be seen' by the midwife	Unexpected feelings of powerlessness	Belief in a normal birth (without medical intervention)	Value being allowed to be themselves by the midwife	Desire not to be influenced by media portrayals of birth as negative, risky and painful		Expect to have a high pain threshold and be able to cope with pain (not their experience)
Maier	Women's worries about childbirth: making safe choices	2010	Australia	Want to give birth to a healthy baby	Belief in a normal birth (without medical intervention)	Want to have drugs and technology and doctors available (safety)	Fear of being manipulated by hospital staff (to have a birth they don't want)	Expect to have an epidural	Expectations influenced by friends and family	Length of labour expectations influenced by family experiences (mother and sisters)	Believe their own welbeing is secondary to the baby's	Expectations of labour and birth shaped by their experiences of antenatal care (devalued and impersonal)	Handing over decision making to 'the experts'
Malacrida & Boulton	The best laid plans? women's choices, expectations and experiences in childbirth	2014	Canada	Belief in a normal birth (without medical intervention)	Belief that a doula can act as an advocate for their birth wishes when they are at their most vulnerable	Belief that the longer they are in hospital the more likely they are to have some kind of intervention	Handing over decision making to 'the experts'	Want to be in a quiet, peaceful environment or have the means to create one	Expect to have choices during labour	Don't want to be induced - perception that this will lead to more interventions	Want to give birth to a healthy baby	Expect that birth plan will give them an element of control	Expect to hold their baby immediately after birth		Concerns about sexuality post birth
Malacrida & Boulton	Women's perceptions of childbirth choices	2012	Canada	Belief in a normal birth (without medical intervention) - more noticeable in primipara's	Belief that c-section is an 'easy way out'	Birth seen as 'sacrifice' to the greater joy of having a healthy baby	Expect to 'go with the flow'	Belief that a vaginal birth is a a messy process (undignified) and to be avoided	Expectations influenced by friends and family
Martin, Bulmer & Pettker	Childbirth Expectations and Sources of Information Among Low- and Moderate- Income NuUiparous Pregnant Women	2013	USA	Preference for normal birth	Expect labour (contractions) to be painful	Belief in body's ability to push baby out	Expect staff to be calm and reassuring	Expect partners or family to there for moral support	Expect to feel happines and joy immediately after birth	Expect to be in control	Expect to 'go with the flow'	Want to give birth to a healthy baby	Expectations informed by media	Expectations informed by family & friends
Melender	What Constitutes a Good Childbirth? A Qualitative Study of Pregnant Finnish Women	2006	Finland	Want to have a quick labour	Expect to stay calm and be aware of what's going on	Expect to be able to control the pain	Expect to be able to move around during labour	Want partner to just 'be there'	Want partner to be an advocate for their labour/birth wishes	Expect partner to accept negative emotions	Expect staff to be kind and empathic	Expect staff to be accepting of women's choices and actions	Expect environment to be private, calm and spacious	Expect staff to be competent and skilled
Murray	Childbirth in santiago de chile: Stratification, intervention, and child centeredness.	2012	Chile	Expectations influenced by friends and family (mainly mother)	Expect providers to respect birth choices and decisions	Belief in a normal birth (without medical intervention)	Expect midwife to act as advocate against 'unecessary interventions'	Want continuity of carer	Want access to information to generate a sense of control	Expect care to be worse in public hospitals	Want to give birth to a healthy baby	Fatalistic attitude of lower class women towards birth
Nakano et al	Childbirth experience according to a group of brazilian primiparas.	2012	Brazil	Have a fear of childbirth	Want to give birth to a healthy baby (not taken for granted)	Expect to have some control over the way labour and birth progress	Expect to be treated with respect and care
Okwako & Symon	Women's expectations and experiences of childbirth in a Kenyan public hospital	2014	Kenya	Want to have their mothers with them to provide moral and emotional support	Expect to be treated with care and respect	Want privacy during labour and birth	Belief in a normal birth (without medical intervention)	Desire for a short labour	Welcome pain as apart of the 'sacrifice' of becoming a mother	Don't want to be alone	Expect to be given information to make choices during labour & birth	Expect support and reassurance from other women in the labour ward	Want company from midwives but don't want to be harrassed
Proctor	What determines quality in maternity care? comparing the perceptions of childbearing women and midwives	1998	UK	Want to have continuity of carer during labour and birth	Want to meet the doctor on duty prior when first arrive at the hospital	Want to have a home-like setting to emphasize that they were not ill	Expect surroundings to be clean	Expect midwives to provide information AND reassurance about labour progress	Want to be listened to and respected	Want partner to be involved in decisions affecting care	Want to feel in control (confidence in asking for advice or information)
Raven et al	The quality of childbirth care in China: women’s voices: a qualitative study	2015	China	Expect to feel safe - enough medical equipment and enough staff to deal with emergencies	Expect facilities to be comfortable, clean and quiet	Expectations informed by mother-in-law	Want continuity of carer during labour and birth	Belief in a normal birth (without medical intervention)	Preference for c.s. as less painful and can choose an 'auspicious' date to give birth	Want information on pain relief choices during prenatal care	Expect providers to be reassuring and technically experienced	Expect providers to be calm and gentle	Expect providers to explain medical procedures	Expect partner and/or mother to be there to offer support and ressurance
Regmi & Madison	Contemporary childbirth practices in nepal: Improving outcomes	2009	Nepal	Expect to give birth in a cowshed (cultural tradition)	Expectations informed by mother-in-law	Belief in a normal birth (without medical intervention)	Belief in playing an active role in labour and birth (rather than it 'being done' by staff	Prefer TBA's because they understand and respect traditional practices	Belief that birth can be 'polluting' and should not occur in the house
Rilby et al	A qualitative study of women's feelings about future childbirth: Dread and delight	2012	Sweden	Fear of the pain assocaited with childbirth	Fear of previous complications arising with the next birth	Fear of giving birth to an unhealthy or malformed baby	Scared of midwives being distant or disrespectful	Fear of being left alone (because of staff shortages)	Looking forward to the feeling of exultation that arises during/after birth	Want midwives to be calm	Want midwives to be competent and capable
Sercekus & Okumus	Fears associated with childbirth among nulliparous women in turkey.	2009	Turkey	Fear of the pain assocaited with childbirth	Fear of panicing and losing control	Fear of medical procedures, e.g. episiotomy	Fear of being left alone during labour and/or birth	Fear of being supported by a rude or unkind midwife	Fears generated by family, friends and the media	Afraid of the uncertainty of labour & birth	Want to deliver in a private, quiet place	Fears associated with labour & birth drive some women to have a c.s.
Sharma, Christenssen & Johansson	The transition of childbirth practices among tribal women in Gujarat, India: A grounded theory approach	2012	India	Labour & Birth seen as 'a trade-off between desirable and essential’, (comfort of home vs safety of modern medicine)	Don't want to be alone in the labour room (with strangers)	Fear of uneccessary interventions	Expect hospitals to be clean and well equipped	Fears reduced if staff are perceived as competent and medically skilled	Willingness to accept medical interventions except c.s. and episiotomy which were viewed as a 'bad birth'
Wilkinson & Callister	Giving birth: The voices of ghanaian women	2010	Ghana	Expect to hand over care to the experts	Want providers to be gentle and patient	Fear of dying during labour/birth	Fear of giving birth to an unhealthy or malformed baby	Fear of c. section	Fatalistic approach - leave it to God to determine the outcome	Expectations strongly influenced by spiritual beliefs	Expectations influenced by mothers	Expect to be quiet during labour & birth (no screaming or shouting)
Dias & Deslandes	Patients' expectations regarding childbirth care at a public maternity hospital in Rio de Janeiro, Brazil: challenges for the humanization of obstetric care	2006	Brazil	Expect there to be no delay on admission	Want to have a quick labour	Belief that women will be less well cared for in public hospitals	Expect to be treated with rudeness and disrespectful care	Fear of being 'punished' by staff for making a scene or screaming during labour	Fear of being abandoned by staff	Expect to hand over care to the professionals - no choices or basic rights	Fatalistic approach - Good care and treatment very much a matter of 'luck'	Want to have partner/birth companion present

## Sheet: Sheet3
HIGH INCOME
Callister, Holt & West Kuhre	Giving Birth down under: the voices of Australian women	2010	Australia	High	Y	Urban setting	Yes - mainly focused on experiences	Very good - within an Australian context	Yes - qualiataive descriptive	Yes - convenience	Yes - in depth interviews with 17 women	Yes - including roles of authors	Yes- supportive quotes	Yes	No	Yes - nut largely limited to an Australian context	B+
Fenwick et al	The childbirth expectations of a self selected cohort of Western Australian women	2005	Australia	High	Y	Range of settings from urban to rural	Yes	Good - extensive	Yes - explorative descriptive but not much on theory	Yes - random based on response to a newspaper advert	Yes - telephone interviews with a self selecting group	Yes - thematic based on constant comparison	Yes - supportive quotes	Yes	No	Yes - covers context, limitations and wider implications	A-
Maier	Women's worries about childbirth: making safe choices	2010	Australia	High	Y	Urban setting	Yes	Adequate	Yes - from a feminist perspective informed by author experiences	Unclear - randomly recruited at an antenatal clinic?	Unclear - 27 in depth interviews but no details on data saturation, etc;	No - no details given and no clear identification of coding or themes	Unclear - plenty of quotes but listed in a rather arbitrary fashion	Yes	No - not discussed	Yes - covers most aspects pertaining to relevance	C+
Hauck et al	The influence of childbirth expectations on Western Australian women's perceptions of their birth experience	2007	Australia	High	Y	Range of settings from urban to rural	Yes - addressing a number of questions from previous research (see 15 Fenwick et al)	Good - extensive	Yes - explorative and descriptive	Yes - Purposive sampling with women from phase 1 of the study (see 15)	Yes - in depth interviews with 14 women who were asked to provide detailed comments on the information they had given in phase 1	Yes - based on grounded theory with constant comparison and coding using pre-determined categories	Yes - supportive quotes	Yes	No	Yes - covers implications in detail but less acknowledgement of context and limitations	B+
Malacrida & Boulton	The best laid plans? women's choices, expectations and experiences in childbirth	2014	Canada	High	Y	Largely set in urban location	Yes	Very good - extensive and detailed	Yes - qualitative design informed by feminist perspective, Foucault and technocratic theories	Yes - variety of methods used including e-amail, adverts and snowball sampling	Unclear - 21 in depth interviews conducted post-anatally as part of a wider ethnographic study. Unclear whether women were also interviewed antenatally and whether this data is included. No details on data saturation	Yes - based on coding of transcripts, generation of themes and iterative discussions between authors	Yes - rich and detailed findings with clear themes supported by quotes	Yes	No	Yes - extensive exploration of relevance incorporating critical feminist theory	B+
Malacrida & Boulton	Women's perceptions of childbirth choices	2012	Canada	High	Y	Urban setting	Yes - a range of aims with 2 different groups of women (interviewed antenatally and postnatally)	Very good - extensive and detailed	Yes - social constructionism from a feminist perspective	Yes - brief details incorporating random (via e-mail and adverts) and snowball	Yes - in depth interviews with prenatal women about their expectations of childbirth and further interviews with mothers (different group) about their actual experiences	Limited - a form of thematic analysis	Yes - plenty of supportive quotes	Yes	No	Yes - partly	B
Callister, Eads & Diel	Perceptions of Giving Birth and Adherence to Cultural Practices in Chinese Women	2011	China & USA	High	Y	Urban settings in China, Taiwan and the US	Yes	Good - focused on Chinese socio-cultural practices around birth	Limited theory and design	Yes - snowball sampling	Yes - in depth interviews until data saturation	Limited - based on a previous guide and appears to be simple thematic analysis	Yes - supportive quotes	Yes	No	Yes - limitations discussed as well as scope of study for Chinese populations in other contexts	B
Murray	Childbirth in santiago de chile: Stratification, intervention, and child centeredness.	2012	Chile	High	Y	Urban setting	Yes - framed in an anthropological context	Good - largely within a South American context	Unclear - appears to be an ethnographic study utilizing multiple visits, interviews and field notes	Unclear - researcher worked with 16 informants over a 1 year period	Unclear - appears to be broadly in accord with ethnography but limited details	Unclear - reported in a descriptive manner having divided the women into 3 groups based broadly on socio-economic circumstances	Yes - findings organised chronologically according to progress of pregnancy and birth and include plenty of supporting quotes	Not discussed	No	Yes - covers context, limitations and implications in good level of detail	C+
Melender	What Constitutes a Good Childbirth? A Qualitative Study of Pregnant Finnish Women	2006	Finland	High	Y	Urban and rural	Yes	Very good - extensive and detailed	Yes - descriptive, based on content analysis though little description of theory	Yes - purposive sampling in rural and urban locations with low risk and high risk women	Yes - in depth interviews with 24 women	Yes - a form of content analysis including coding of data, categorization and constsnt comparison	Yes - clear presentation of classification system used and a few supportive quotes	Yes	Yes - partial	Yes - covers context, limitations and implications	A-
Halldorsdottir & Karlsdottir	Journeying through labour and delivery: perceptions of women who have given birth	1996	Iceland	High	Y	Urban setting	Yes	Very good - extensive and detailed	Yes - loosely based on phenomenology	Unclear - 'through a network of colleages'	Unclear - single interviews with 14 women ranging in age from 23 - 42. Limited details on approach used	Yes - coding of transcripts and constant comparison - loosely based on phenomenology	Yes - supportive quotes	Yes	No - mentioned but not discussed	Yes - covers context, limitations and implications	B-
Aune et al	Promoting a normal birth and a positive birth experience — Norwegian women's perspectives	2015	Norway	High	Y	Urban setting	Yes	Good - extensive	Yes - Good description based on Antonovsky	Yes - selective sampling based on women who self identified as having a positive birth experience	Yes - in depth interviews with 12 women	Yes - based on Malterud	Yes - phenomenological descriptors	Yes	No	Yes - but limited to women who had a positive birth experience	B+
Lundgren	Swedish women's experience of childbirth 2 years after birth	2005	Sweden	High	Y	Urban setting	Yes	Adequate	Yes - phenomenological accounts of women's chidbirth experiences	Unclear - appears to be a radomly selected group from a purposive sample? Participants may have been involved via another study	Limited - single in depth interviews	Yes - but limited explanation of how data from the individual interview transcripts was merged	Yes - plenty of quotes to support themes	Yes	? - bracketing explained in theory but no mention of author views	Yes - covers most aspects of relevance in a rich discussion	B-
Rilby et al	A qualitative study of women's feelings about future childbirth: Dread and delight	2012	Sweden	High	Y	Urban	Yes - in response to an open ended question on a questionnaire	Brief and simple	Limited theory - based on responses to an open ended survey question - 'Please describe your feelings when you think about giving birth in the future'?	Yes - follow up to a larger survey based study using prospective sampling	Yes - narrative response to a survey question	Yes - qualitative content analysis (appropriate for this type of data) of manifest and latent data	Yes - simplistic themes supported by quotes	Yes	No	Yes - covers impllications but little exploration of context (given the nature of the data) or limitations	B-
Brodrick	Exploring women’s pre-birth expectations of labour and the role of the midwife	2008	UK	High	Y	Urban setting	Yes - pre birth expectations AND role of the midwife	Good - extensive	Limited theory	Random - based on meeting inclusion criteria	Yes - in depth interviews but no details of saturation	Yes - based on Attride-Stirling approach	Yes - supportive quotes	? - discussed but no approval details mentioned	Yes - role of the researcher in data collection discussed	Yes - reasonably broad discussion	B
Gibbins & Thomson	Women's expectations and experiences of childbirth	2001	UK	High	Y	Urban setting	Yes	Very good - extensive and detailed	Yes - Phenomenology using Husserlian approach	Yes - purposive in accord with phenomenological approach	Yes - pre and post natal interviews with 8 women	Yes - detailed and in accord with method used	Yes - supportive quotes throughout	Yes	Yes - bracketing and the role of the researcher discussed though the actual views of the researcher are not present	Yes - covers limitations, implications and context.	A-
Proctor	What determines quality in maternity care? comparing the perceptions of childbearing women and midwives	1998	UK	High	Y	Urban setting	Yes - comparison of pregnat women and midwives r.r. perception of childbirth	Adequate	Limited theory - more an explanation of the use of focus groups	Limited detail - maximum varaition sampling including 33 women (19 pre and 14 post natal)and 47 staff members	Unclear - author mentions focus groups AND interviews but no details of how many, group sizes, etc; No information on data saturation	Yes - loosely based on thematic analysis with the generation of codes from the transcripts. Separated into women and staff	Unclear - categories well defined but limited supporting quotes	Yes	No	Yes - partly covers implications and recommendation but not informed by context or limitations	C+
Highsmith	Primiparas' expectations of childibirth: The impact of consciousness	2006	USA	High	Y	Urban setting	? - broadly to explore women's experiences and expectations of childbirth	Very good - extensive and detialed	Yes - excellent discussion of theory and approach including use of drawing to illustrate the 'ideal birth'	No details other than 8 women were included	Yes - in depth pre and post natal interviews with each participant plus pre-natal drawings to illustrate ideal birth	Yes - largely based on phenomenological approach	Yes - including publication of women's pre-natal drawings	Not discussed	Yes	Yes - encompassing research and literature from the fields of art therapy, quantum physics and psychology	B+
Martin, Bulmer & Pettker	Childbirth Expectations and Sources of Information Among Low- and Moderate- Income NuUiparous Pregnant Women	2013	USA	High	Y	Urban setting	Yes	Adequate	Yes - phenomenological drawing on Husserlian approach to 'lived experinece'	Yes - non probability purposive sampling at an antenatal clinic with predefined inclusion criteria	Unclear - semi structured interviews with 7 participants not in keeping with phenomenological methodology	Yes - detailed description of coding and identifiaction of themes	Yes - plenty of supportive quotes	Yes	Yes!	Yes - covers context, limitations and implications	B
MIDDLE INCOME
Marin et al	Expectations and feelings of single mothers on the birth experience	2009	Brazil	Upper Middle	Y	Urban setting	Yes	Good - extensive	Limited theory and poorly explained design	Yes - as part of a lonitudinal study	Yes - Reasonably detailed	Limited - content analysis	Yes - supportive quotes	No	No	Yes - in the context of single mothers	C+
Pinheiro & Bittar	Expectations, perceptions and experiences of normal birth: report of a group of women	2013	Brazil	Upper Middle	Y	Urban setting	Yes	Good - extensive	Limited theory	No details - Random?	Confusing - some interviews prenatal, some post interspersed with some observational work	Limited - discourse analysis but no details	Yes - supportive quotes	Yes	No	Yes - partly, within a Brazilian context	C+
Dias & Deslandes	Patients' expectations regarding childbirth care at a public maternity hospital in Rio de Janeiro, Brazil: challenges for the humanization of obstetric care	2006	Brazil	Upper Middle	Y	Urban setting	Yes - within the context of a 'humanization of childbirth' policy advocated by the Brazilian government	Adequate	Limited theory - basic qualitative research supported by ethnographic data	Unclear - appears to be purposive sample of multipara's at a prenatal clinic	Yes - indepth interviews with 22 women supported by ethnographic observations	Unclear - appears to be based on an initial framework supported by themes generated from the transcripts and triangulated with ethnographic observations & notes	Yes - rich and detailed thematic descriptors with supporting quotes	No	No	Yes - implications and context covered but not much on limitations	C+
Nakano et al	Childbirth experience according to a group of brazilian primiparas.	2012	Brazil	Upper Middle	Y	Urban setting	Yes	Adequate	Yes - Based on social constructionist principles	Yes - convenience sample of 20 women recriuted 1 month post-natally when they attended a vaccination clinic	Yes - in depth interviews analysed iteratively until data saturation achieved	Yes - basic thematic analysis	Yes - supportive quotes in accord with themes	Yes	? - view of the authors mentioned briefly. border ofthebiologicalaspectsdominatingtheparturition process toaccessthemultidimensionalityinvolvingbirth	Yes - explored within a Brazilian context but little mention of study limitations/weaknesses	B
Raven et al	The quality of childbirth care in China: women’s voices: a qualitative study	2015	China	Upper Middle	Y	Rural	Yes	Adequate	Limited theory - broad qualitative design utilizing interviews and FGD,S	Yes - purposive sampling at a variety of hospitals but no details on how women were recruited	Yes - interviews and FGD's using a topic guide but details limited	Unclear - based on coding and development of themes using a framework but no details on data saturation or precise method used	Yes - findings illuminated by pertinent quotes	Yes	No	Yes - covers context, implications and limitations	B-
Craig & Kabylbekova	Culture and Maternity Care in Kazakhstan: What New Mothers Expected	2015	Kazakhstan	Upper Middle	Y	Urban setting	Yes	Very good - extensive and contextually detailed	Simple descriptive giving detail on the rationale behind using focus groups but nothing else	Yes - random to begin with and then snowballocus groups	Yes - two focus groups but limited details on data requirements, saturation, etc	Yes- based on grounded theory with open and axial coding	Yes - supportive quotes	Yes	No	Yes - covers context, limitations and wider implications	B-
Chuahorm et al	Fear and Suffering During Childbirth Among Thai Women	2007	Thailand	Upper Middle	Y	Semi Urban Central Province	Yes	Adequate - largely in a Thai context	Yes - largely based on grounded theory	Yes - purposive initially followed by theoretical sampling based on participant characteristics	Yes - according to grounded theory principles	Yes - coding and comparison to build categories	Yes - supportive quotes	Yes	No	Yes -detailed and including implications but no details of limitations	B
Sercekus & Okumus	Fears associated with childbirth among nulliparous women in turkey.	2009	Turkey	Upper Middle	Y	Urban setting	Yes - framed by chilbirth fears in nuliiparous women	Brief and simple	Limited theory - descriptive qualitative research	Yes - purposive sample of women attending an outpatient clinic	Yes - interviews with 19 women - recruitment continued until data saturation	Yes - content analysis including coding and categorization of data	Yes - themes underpinned with supporting qoutes	Yes	No	Yes - covers context and implications but no detail on limitations	B-
Callister et al	Giving Birth: the voices of Ecuadrian women	2010	Ecuador	Middle	Y	Urban setting	Yes	Good - extensive	Yes - based on ethnographic principles	Unclear - appears to be random on the post natal ward	Yes - in depth interviews framed by observation	Limited - thematic analysis from transcript data	Yes - supportive quotes	Yes	No?	Yes - focus on Ecuador with implications for Ecuadorian women living in other countries	B
D'ambruoso, Abbey & Hussein	Please understand when I cry out in pain: women's accounts of maternity services during labour and delivery in Ghana maternity services during labour and delivery in Ghana	2005	Ghana	Lower Middle	Y	Semi-Urban - outskirts of ACCra	Yes - as part of a wider study	Very good - extensive and contextually detailed	Yes - qualitative and descriptive using focus groups and latterly interviews	Yes - opportunistic as part on a wider study	Yes - two focus groups and 21 interviews	Limited - concurrent thematic analysis from transcript data - until thematic saturation	Yes - supportive quotes	Yes	No - though researcher influence acknowledged	Yes - excellent discussion of limitations, implications, methodological issues and contextual nuances	B
Wilkinson & Callister	Giving birth: The voices of ghanaian women	2010	Ghana	Lower Middle	Y	Rural	Yes	Good - largely within a Ghanian context	Yes - ethnographic informed by interviews, observations and field notes using health belief model as an underpinning theory	Yes - 24 women selected randomly at clinic then snowball sampling to women in outlying villages	Yes - in depth interviews contextualized by observations & field notes	Yes - in accord with Spradley including iterative coding of transcripts and thematic development	Yes - detailed and contextually rich with supporting quotes	Yes	No	Yes - partly covers implications and recommendations but not informed by context or limitations	A-
Corbett & Callister	Giving Birth: the voices of women in Tamil Nadu, India	2012	India	Lower Middle	Y	Rural	Yes	Very good - extensive and contextually detailed	Yes - but limited information on underpinning theory. Appears to be ethnographic	Yes - initially convenience in post partum unit followed by snowball sampling	Yes - recruitment continued until theoretical saturation	Partly? - a little confusing - generation of themes from transcription and field notes (simple descriptive? Ethnographic?), also incorporating elements of phenomenology, 'what is this woman saying?'	Yes - supportive quotes	Yes	No	Yes - covers virtually all elements of relevance	B+
Sharma, Christenssen & Johansson	The transition of childbirth practices among tribal women in Gujarat, India: A grounded theory approach	2012	India	Lower Middle	Y	Rural	Yes	Good - mainly within the context of national and local maternity policy	Yes - grounded theory approach using focus groups with women plus interviews with stakeholders as well as field notes & observations	Yes - largely in accord with grounded theory approach though unclear how women were	Yes - a combination of FGD's, interviews, observations and field notes including FGD's with 85 women (childless, pregnant and mothers)	Yes - in accord with grounded theory	Yes - detailed and comprehensive with quotes to support constructs and theoretical development	Yes	No	Yes - detailed discussion covering context and implications but no detail on limitations	A-
Okwako & Symon	Women's expectations and experiences of childbirth in a Kenyan public hospital	2014	Kenya	Lower Middle	Y	Urban setting	Yes	Adequate	Yes - 2 stage qualiatative design (pre & post natal) though little detail on theory (loosely based on phenomenological approach)	Yes - convenience sample at an antenatal clinic	Yes - 2 in depth interviews with 7 women (pre & post natal)	Yes - interpretive phenomenological analysis generating themes and sub themes develpoed iteratively between the 2 authors independently	Yes - plently of quotes to support themes	Yes	No	Yes - covers context, limitations and implications	B+
Gomi	Women's delivery care needs in rural Bangladesh: Recommenendations for skilled birth attaendants	2013	Bangladesh	Lower Middle	Y	Rural	Yes	Adequate	Yes - qualiataive descriptive	Unclear	Yes - in depth interviews with 8 women	Yes - thematic based on constant comparison	Yes - supportive quotes	Yes	No	Unclear - article translated from Japanese	C	Following translation
LOW INCOME
Kaphle et al	Childbirth traditions and cultural perceptions of safety in Nepal: Critical spaces to ensure the survival of mothers and newborns in remote mountain villages	2013	Nepal	Low	Y	Rural	Yes	Good - mainly within cultural context	Yes - social constructionist incorporating theories on oppression and feminism	Yes - purposive sample of a variety of participants in a remote location in rural Nepal	Yes - in depth interviews and accompanying field notes	Yes - simple coding of data followed by thematic analysis	Yes - supported by exteensive quotes	Yes	Yes - 'bracketing' of interviewers preconceptions and beliefs	Yes - but no discussion of limitations and question marks about the generalisability about such contextually nuanced findings	A-
Regmi & Madison	). Contemporary childbirth practices in nepal: Improving outcomes	2009	Nepal	Low	Y	Rural	Yes	Good - mainly within cultural context	Limited theory and very brief explanation of design	Unclear - Described as purposive but no details of recruitment or strategy		Unclear - described as open, axial & selective coding based on grounded theory but no details of iteration, data saturation or how themes emerged	Yes - Supportive quotes to highlight themes	Yes	No	Yes - reasonably detailed and contextually framed but limitations not explored	C+

## Sheet: Sheet4
Belief in a Normal Birth	Desire to be in control	Expect staff to be sensitive, caring and kind	Fear of staff being distant, insensitive or rude	Expect to 'go with the flow'	Want a healthy baby	Fear of Childbirth	Expect birth to be painful	Need for a safe and supportive environment	Fear of being alone	Hope for a quick labour	Value the support of a birth companion	Influence of traditional beliefs	Expect to be passive	Expect medical intervention	Fear of medical intervention	Belief in birth as a transcendental experience	Expect health professionals to be skilled and competent	Want continuity of carer	Expectations influenced by family and friends	Expectations influenced by media	No expectations	Want to hold their baby after birth
Belief in a normal birth (without medical intervention) x17	Expect to be 'in control' (x2)	Need for others to be sensitive and caring	Do not expect staff to be rude, insensitive and lacking in empathy	Expect to 'go with the flow' (x4)	Want to give birth to a healthy baby (x11)	Have a fear of childbirth (x4)	Fear of the pain assocaited with childbirth (x2)	Belief in a safe environment	Fear of being alone (x3)	Want to have a quick labour (x3)	Importance of family support - parents and/or partner (x4)	Expectation of birth strongly influenced by traditional & cultural beliefs x2	Expect to hand over care to the experts	Expect to have a caesarean section	Fear of medical procedures, e.g. episiotomy	Belief in pain as a sacrifice to be expected and endured for the greater joy of having a baby	Expect midwives to provide information AND reassurance about labour progress	Want to have continuity of carer during labour and birth (x3)	Expectations influenced by friends and family (mainly mother)	Expectations partially informed by media represenataions of birth - painful, on a bed, in a hospital	Don't really know what to expect (primipara's)	Expect to hold their baby immediately after birth (x2)
Belief in birth as a natural process (x3)	Expect to have control over decision making	Expect to be treated with care and respect (x3)	Expect to be treated with rudeness and disrespectful care	Expect to 'go with the flow' (led to positive birth experience)	Expect to give birth to a healthy baby (x2)	Fear of the unknown (x4)	Expect labour and birth to be painful	Expect to feel safe - enough medical equipment and enough staff to deal with emergencies	Don't want to be alone in the labour room (with strangers)	Desire for a short labour	Want to have their mothers with them to provide moral and emotional support	Place of birth (barn) influenced by cultural association with safety	Unexpected feelings of powerlessness	Belief that birth is a 'medical event'	Fear of uneccessary interventions	Belief in birth as a spiritual experience	Fears reduced if staff are perceived as competent and medically skilled	Want to have a familiar midwife looking after them - someone thay have met before	Expectations informed by mother-in-law (x2)	Expectations informed by media	Want to keep an open mind about pain relief
Belief in better recovery post-natally if birth is normal (x3)	Expect to stay calm and be aware of what's going on	Want to 'be seen' by the midwife	Fear of being supported by a rude or unkind midwife	Expect to 'go with the flow' i.e. the birth process, guided by bodily signals	Fear of giving birth to an unhealthy or malformed baby (x4)	Fear of previous complications arising with the next birth	Expect to experience a lot of pain	Expect facilities to be comfortable, clean and quiet	Expect to not be alone - for feelings of safety and reassurance (x2)	Belief that the longer they are in hospital the more likely they are to have some kind of intervention	Belief that a doula can act as an advocate for their birth wishes when they are at their most vulnerable	Expect to give birth in a cowshed (cultural tradition)	Handing over decision making to 'the experts (x2)	Expect to have an epidural	Fear of c. section	Belief in a spiritual dimension to birth	Expect providers to be reassuring and technically experienced		Expectations informed by family & friends (especially mother)	Desire not to be influenced by media portrayals of birth as negative, risky and painful
Belief that birth is simple and straightforward	Expect to be able to cope with pain	Want providers to be gentle and patient	Want to be listened to and respected	Expect childbirth to be unpredictable (x2)	Fear of something bad happening to the baby	Fear of dying during labour/birth	Expect birth to be very painful	Want to have drugs and technology and doctors available (safety)	Fear of being left alone (because of staff shortages)	Expect labour & birth to be a slow process - surprise when it isn't (x2)	Value of having a birth companion to provide practical and emotional support	Expectatations informed by cultural traditions	Expect to hand over control to doctors	Belief that a vaginal birth is a a messy process (undignified) and to be avoided	Willingness to accept medical interventions except c.s. and episiotomy which were viewed as a 'bad birth'	Birth seen as 'sacrifice' to the greater joy of having a healthy baby	Want midwives to be competent and capable		Expectations informed by family & friends (x5)
Belief in body's ability to push baby out	Expect to be able to control the pain	Expect staff to be kind, encouraging, supportive and patient	Fear of hospital staff being uncaring or abusive		Fear and anxiety assocaited with giving birth to an unhealthy or malformed baby	Belief that birth is frightening and painful	Unprepared for the intensity of the pain	Want to have a home-like setting to emphasize that they were not ill	Fear of being abandoned by staff		Expect to have partner present to offer support during labour & birth	Expect to uphold cultural traditions during labour and birth	Faith in the health professionals to do what's best (passivity)	Preference for c.s. as less painful and can choose an 'auspicious' date to give birth	Don't want to be induced - perception that this will lead to more interventions	Expect to feel happines and joy immediately after birth	Need to be supported by a technically competent midwife		Expectations informed by mother (x2)
Have faith in their own bodies	Expect to have some control over the way labour and birth progress	Expect staff to be calm and reassuring	Expect midwife to be popping in and out (being unattentive)		Believe their own welbeing is secondary to the baby's	Expect birth to be a scary and painful experience	Expect labour (contractions) to be painful	Expect hospitals to be clean and well equipped	Don't want to be alone		Value presence of a companion for reassurance about decisions and actions in the unfamiliar hospital environment	Belief that birth can be 'polluting' and should not occur in the house	Fatalistic approach - leave it to God to determine the outcome	Fears associated with labour & birth drive some women to have a c.s.		Welcome pain as apart of the 'sacrifice' of becoming a mother	Expect staff to be competent and skilled		Negative expectations influenced by friends and family
Expect birth to be a positive and simple experience (x2)	Ability to make choices	Need to be supported by a competent, caring midwife	Belief that women will be less well cared for in public hospitals			Afraid of the uncertainty of labour & birth		Expect surroundings to be clean	Expect to be alone		Expect partners or family to there for moral support	Expectations strongly influenced by spiritual beliefs	Belief in God's will (x2)			Looking forward to the feeling of exultation that arises during/after birth	Expect staff to be skilled and technically competent		Length of labour expectations influenced by family experiences (mother and sisters)
Expect to use non-pharmacological approaches to cope with pain	Belief in playing an active role in labour and birth (rather than it 'being done' by medical staff)	Preference for a women centred midwife rather than one focused on tasks and equipment	Fear of being manipulated by hospital staff (to have a birth they don't want)			Multipara's less fearful about birth comapred to primipara's		Belief in the hospital as the best place to give birth (safety and security)			Want partner to just 'be there'	Belief in TBA'S to facilitate childbirth	Expect to hand over care to the professionals - no choices or basic rights			Sub-conscious depictions show women expect labour and birth to be a transcendental experience
Expect to feel calm during labour & birth	Expect to have choices during labour	Want midwives to be calm	Scared of midwives being distant or disrespectful			Reassurance and confidence from previous births (multipara's)		Expect facility to have an ambulance in place in case of emergency			Expect partners to be the main source of support	Prefer TBA's because they understand and respect traditional practices	Fatalistic approach - Good care and treatment very much a matter of 'luck'
	Need to feel a sense of control (x2)	Positive influence of caring and attentive health professionals	Fear of being 'punished' by staff for making a scene or screaming during labour					Want to deliver in a private, quiet place			Want partner to be an advocate for their labour/birth wishes	Expecatation that staff will understand and respect different cultural practices	Fatalistic attitude of lower class women towards birth
	Want to feel in control (confidence in asking for advice or information)	Expect staff to be kind and empathic	Expectations of labour and birth shaped by their experiences of antenatal care (devalued and impersonal)					Expect to be quiet during labour & birth (no screaming or shouting)			Expect partner to accept negative emotions
	Expect to be given information to make choices during labour & birth	Expect hospital staff to be supportive and available						Need to feel safe and secure (reassurance from the midwife)			Want partner to be involved in decisions affecting care
	Need to be involved in decision making	Want company from midwives but don't want to be harrassed						Want privacy during labour and birth			Expect partner to be present and supportive
	Expect that birth plan will give them an element of control	Expect providers to respect birth choices and decisions						Want to be in a quiet, peaceful environment or have the means to create one			Want to have partner/birth companion present
	Expect staff to be accepting of women's choices and actions	Value being given information and support during labour and birth						Expect environment to be private, calm and spacious			Expect partner and/or mother to be there to offer support and ressurance
	Expect to have the ability to make choices	Want to feel reassurance from the midwife						Labour & Birth seen as 'a trade-off between desirable and essential’, (comfort of home vs safety of modern medicine)			Need to have a supportive partner present
	Expect to practice birthing techniques learned prenatally							Expect to have resources to support labour (Birth ball, pool, rocking chair,etc;)
	Want access to information to generate a sense of control							Expect to be able to move around during labour
	Expect to feel in control - informed and involved in decisions							Want a nice smelling soom with quiet music
	Fear of panicing and losing control							Expect support and reassurance from other women in the labour ward
								Want a relaxed and supportive environment

## Sheet: Sheet5
	Review finding	Studies contributing to the review finding [code]	Methodological Limitations	Adequacy of Data	Coherence	Relevance	CERQual Assessment	Explanation of confidence in the evidence assessment
1	Belief in a 'Normal Birth' (without medical intervention). Women believe birth is a natural process and want to rely on their bodies to deliver their baby in a simple and straightforward manner without the aid of medical intervention	18 Studies - 2, 3, 4, 6, 7, 9, 13, 17, 19, 20, 21, 22, 23, 24, 26, 28, 30, 31	Minor methodological limitations in 5/18 studies mainly around sampling strategy and analysis of data	Rich data from a range of settings, contexts and sub-populations	Minor concerns about coherence given that several studies also found that women expect to have access to medical interventions (see review finding 12)	Finding in accord with conext of review question	High	It is important to highlight that in four of the studies (3, 6, 20, 22) women's belief in a normal birth was tempered by their expectation that medical intervention(s) may be necessary. However, this does not affect the integrity of the review finding as the women fundamentally believed in a normal birth
2	Desire to be in control: Women expect to exert some control over the way their labour progresses including being informed of developments, being involved in decision making and being able to manage their pain (with or without pharmacological intervention).	13 Studies - 2, 7, 11, 13, 16, 17, 22, 25, 26, 27, 28, 30, 32	Minor methodological limitations in 4/13 studies mainly around sampling strategy, data collection and analysis of data	Rich data from a range of settings, contexts and sub-populations	Minor concerns about coherence given that several studies also found that women expected to be passive during labour and birth (see review finding 11)	Finding in accord with context of review question	High	Women's desire for control during labour & delivery should be contrasted with review finding 11 which emphasizes women's expectations about labour and delivery being a passive process where care (including decision making) is handed over to 'the experts'.
3	Hope for a quick labour: Some women want labour to be a relatively quick process and sometimes believe that the longer it lasts the more likely they are to require (unwanted) medical intervention.	6 Studies - 8, 14, 22, 25, 28, 38	Minor methodological limitations in 1/6 studies mainly around sampling strategy and analysis of data	Minor concerns about adequacy of data as information is limited from LIC's	Minor concerns about coherence given that women in 2 studies (7 & 8) expected labour to be slow and expressed surprise when it wasn't	Finding in accord with context of review question	Low	Finding downgraded from moderate to low because of contrasting information from two studies (7 & 8) in which women's expectations of labour were inconsistent with the review finding
4	Value the support of a birth companion: Woman want to have a birth companion present during labour and birth to offer moral, emotional and practical support and to act as their advocate during times when they may not be able to express themselves adequately. The birth companion could be a partner, mother, mother-in-law, trusted family friend or a doula	15 Studies - 2, 3, 6, 8, 11, 14, 15, 16, 18, 22, 24, 25, 30, 31, 38	Minor methodological limitations in 5/15 studies mainly around samling strategy, data collection and analysis	Rich data from a range of settings, contexts and sub-populations	Findings across studies are consistent and coherent	Finding in accord with context of review question	High	Finding graded as high because of the range of studies, the richness of the data and the consistency of the finding in relation to the review question
5	Expect staff to be sensitive, caring and kind: Women expect staff to be sensitive to their needs, kind in their approach and reassuring in the way they offer care.	17 Studies - 3, 6, 9, 10, 12, 16, 17, 20, 24, 25, 26, 27, 28, 30, 31, 33, 37,	Minor methodological limitations in 7/17 studies mainly around sampling strategy, data collection and data analysis	Rich data from a range of settings, contexts and sub-populations	Findings across studies are consistent and coherent	Finding in accord with context of review question	High	Finding graded as high because of the range of studies, the richness of the data and the consistency of the finding in relation to the review question
6	Fear of staff being distant, insensitive or rude: Women have a fear of staff being insensitive or unavailable or manipulative during labour and birth and, in specific contexts, actually expect staff to be rude, disrespctful or abusive.	8 Studies - 6, 9, 12, 21, 26, 33, 34, 37	Moderate methodological limitations given that 5/7 studies had concerns around sampling strategy, data collection, and analysis	Minor concerns about adequacy of data (8 studies that together offered moderately rich data overall)	Minor concerns about coherence given the discrepency between 'fears' and 'expectations' (see explanation)	Finding in accord with context of review question	Moderate	The review finding focuses on women's fears of staff being rude or insensitive which may or may not be unfounded. However in one study (37) women expected staff to be rude and or abusive which suggests that in this particular context (a public hospital in Brazil) this kind of behaviour was perceived as 'the norm'
7	Want a healthy baby - Women want to give birth to a healthy baby and either express this desire directly or highlight their fear of giving birth to an unhealthy or malformed baby.	16 Studies - 2, 5, 9, 12, 13, 14, 15, 17, 18, 21, 22, 24, 26, 27, 33, 37	Minor methodological limitations in 4/15 studies mainly around sampling strategy and data collection methods	Rich data from a range of settings, contexts and sub-populations	Findings across studies are consistent and coherent	Finding in accord with context of review question	High	Finding graded as high because of the range of studies, the richness of the data and the consistency of the finding in relation to the review question
8	Expect to go with the flow - Some women (particularly multipara's) expect labour and birth to be an unpredictable experience and are prepared to go with the flow to achieve the desired outcome (a healthy baby). Going with the flow includes being aware of and trusting physiological signals and accepting that medical intervention(s) may be necessary to ensure a safe outcome.	7 Studies - 4, 6, 13, 17, 20, 23, 24	Minor methodological limitations in 1/7 studies related to poor explanation of sampling strategy and limited discussion of how themes were generated	Minor concerns about adequacy of data (7 studies that together offered moderately rich data overall)	Minor concerns about coherence given that 'going with the flow' may be interpreted in different ways, i.e. physiological or medical	Minor concerns about relevance given that the finding was identifified in HIC's only	Moderate	All criteria exhibit some minor concerns but the lack of data from LMIC's is notable
9	Need for a safe and supportive environment - Women want to feel that they are in a safe and supportive environment during labour and birth. They acknowledge this in a number of different ways including the cleanliness of the environment, the immediate availability of medicines, medical equipment, resources (birth stools, birth balls, etc;) and staff as well as the need to be in a quiet, private s…	13 Studies - 4, 6, 12, 15, 16, 18, 22, 25, 28, 31, 34, 35, 37	Minor methodological limitations in 3/12 studies mainly around study design and analysis of data	Rich data from a range of settings and contexts	Minor concerns about coherence given that safety may be interpreted in a variety of different ways	Finding in accord with context of review question	High	Finding graded as high because of the range of studies, the richness of the data and the consistency of the finding in relation to the review question
10	Fear of being alone - Women don't want to be on their own during labour and delivery, either in a literal sense by being left unattended or in a more abstract sense by being 'cared for' by strangers (staff they haven't met before)	10 Studies - 2, 3, 4, 9, 11, 28, 33, 34, 35, 38	Moderate methodological limitations given that 6/10 studies had some concerns over study design, sampling strategy, data collection and/or data analysis	Fairly rich data from a range of settings and contexts	Findings across studies are consistent and coherent.	Minor concerns about relevance given that the finding is largely confined to expectations of 'public hospitals' where, in some contexts, the presence of a birth companion is restricted.	Moderate	Finding could be downgraded to low because of concerns over relevance and methodological quality of included studies but supported by the high confidence in review finding 4 (value the support of a birth companion)
11	Expect to be paasive (during labour and birth) - Women believe that they have no control over labour and birth and are prepared to relinquish responsibility by handing over care to health professionals who they perceive to be birthing experts. In some instances women adopt a fatalstic approach by accepting that labour and birth are in the hands of God.	10 Studies - 3, 5, 6, 19, 20, 21, 22, 26, 37, 38	Moderate methodological limitations given that 6/10 studies had some concerns over study design, sampling strategy, data collection methods and analysis	Fairly rich data from a range of settings and contexts	Findings across studies are consistent and coherent.	Minor concerns about relevance as 6 studies (3, 5, 19, 26, 36,37) identified women as being from lower socio-economic groups which may be a factor in this review finding	Moderate	Women's passivity should be contrasted with review finding 2 which emphasizes women's desire to be in control during labour and delivery
12	Want to have medical intervention(s) - Women expect to be offered medical intervention(s) during labour and birth and recognise the benefits of an epidural (for pain relief) and/or a caesarean section to help with pain relief or to give birth on an auspicious date (China) or because they believe natural birth is too messy (Brazil).	6 Studies - 3, 17, 21, 23, 31, 34	Moderate methodological limitations given that 4/6 studies had some concerns over design, sampling strategy and data collection methods	Moderate concerns over adequacy of data as relatively thin from a relatively small number of studies	Minor concerns about coherence given that, in some instances, women's expectations may be influenced by the prevailing medical model (Brazil & China)	Moderate concerns about relevance given that there is no data from LMIC's	Low	Women's expectation of medical intervention(s) should be contrasted with review finding 1 in which women express a belief in normal birth and review finding 13 in which women highlight a fear of medical intervention(s)
13	Fear of medical intervention - women have a fear of 'uneccessary' medical interventions and highlight caesarean section, episiotomy and induction as being of particular concern	4 Studies - 22, 34, 35, 36	Minor methodological limitations given that 1/4 studies had some concerns over study design	Moderate concerns over adequacy of data as relatively thin from a relatively small number of studies	Findings across studies are consistent and coherent.	Minor concerns over relevance given that one of the studies (34) only included women who had a self identified fear of labour & birth	Low	Women's fear of medical intervention(s) should be contrasted with review finding 12 in which women express their desire to have medical intervention(s). Review finding downgraded from moderate to low because of the very limited number of studies
14	Belief in the transcendence of birth - Women believe labour and birth elicit feelings of exultation and joy and may recognize the associated pain as a sacrifice to the greater transcendental experience of giving birth	6 Studies - 5, 7, 18, 23, 28, 33	Minor methodological concerns in 1/6 studies around design	Minor concerns over adequacy of data given the relatively small number of studies	Minor concerns over coherence given that 'pain as a sacrifice' may or may not indicate a belief in a transcendental experience	Moderate concerns about relevance given that 2 of the studies (5 & 7) were framed around the meaning of childbirth rather than expectations and wants in intra-partum care	Low	Review finding downgraded to low because of the limited number of studies
15	Expect health professionals to be skilled and competent - Fears around childbirth are reduced if women are cared for by health professionals who are perceived to be technically skilled and knowledgable with the ability to offer experiental reassurance when required.	7 Studies - 15, 17, 25, 30, 31, 33, 35	Moderate methodological limitations in 3/7 studies around design, data collection and analysis	Minor concerns over adequacy of data given the relatively small number of studies	Findings across studies are consistent and coherent.	Finding in accord with context of review question	Moderate	Finding graded as moderate largely because of the limited number of studies
16	Want continuity of carer - Women would like to have the same midwife looking after them for the duration of labour and birth. Ideally, they would like a familiar midwife to be with them (somebody they know from prenatal care) but recognize that this is less likely to happen	4 Studies - 14, 26, 30, 31	Substantial methodological concerns in 3/4 studies around design, sampling strategy, data collection, analysis and theme generation	Moderate concerns over adequacy of data given the relatively small number of studies	Findings across studies are consistent and coherent.	Finding in accord with context of review question	Low	Finding graded as low because of the limited number of studies and their level of methodological rigour
17	Want to hold their baby - In two studies from North America Women expressed a desire to hold their baby immediately after birth	2 Studies - 18, 22,	Very minor methodological limitations - both studies graded B+ or above during quality appraisal	Substantial concerns over adequacy of data as finding supported by thin data from 2 studies	Findings across studies are consistent and coherent.	Substantial concerns over relevance given that the finding comes from 2 HIC's both in North America	Very Low	Finding graded as very low because only two studies highlight this finding
18	Expectations influenced by family and friends - Women's expectations of labour and birth are shaped by their conversations with mother's, mother's-in-law, and friends and tend to reflect negative portrayals of birth.	14 Studies - 2, 3, 4, 8, 13, 19, 21, 23, 24, 26, 31, 32, 34, 37	Minor methodological limitations in 5/14 studies relating to design, sampling, data collection and analysis	Rich data from a range of settings and contexts	Findings across studies are consistent and coherent.	Moderate concerns about relevance given that this finding informs women's expectations rather than directly answers what their expectations are	Moderate	Finding downgraded from high to moderate because of concerns about the relevance of the finding to the purpose of the review
19	Expectations influenced by media - Women's expectations of labour and birth may be shaped by (negative) media representations of birth and can, in some instances, encourage women to rail against the negative portryals by reinforcing a determination not to conform to the media depictions	4 Studies - 13,18, 20, 24	Minor methodological limitations in 1/4 studies mainly around sampling strategy, data analysis and theme generation	Moderate concerns over adequacy of data given the relatively small number of studies	Minor concerns about coherence given that women in one of the studies (20) made a conscious decision not to be influenced by the media	Substantial concerns about relevance given that this finding informs women's expectations rather than directly answers what their expectations are. Finding also restricted to HIC's only	Very Low	Finding downgraded from low to very low because of concerns about the relevance of the finding to the purpose of the review
20	No expectations - Women from 2 countries had no expectations of labour and birth and preferred to try and keep an open mind	2 Studies - 14, 16	Moderate methodological concerns in one of the studies around sampling strategy and data collection methods	Substantial concerns over adequacy of data as finding supported by thin data from 2 studies	Findings across studies are consistent and coherent.	Substantial concerns about relevance given that this finding is not supported by other findings (about wants & expectations) within the same studies . Finding also restricted to 2 HIC's only	Very Low	Finding graded as very low because only two studies in HIC's highlight this finding
21	Acknowledgement of traditional beliefs - Women's expectations of labour and birth can be strongly inflenced by traditional and cultural beliefs ranging from giving birth in a particular place, (often with the help of TBA's), to the use of traditional herbs & medicines and the practice of specific spiritual customs. Women value these traditions and, in certain contexts, want health professionals t…	6 Studies - 8, 10, 15, 19, 32, 37	Minor concerns about methodology in 1/6 studies around sampling strategy and analysis	Minor concerns over adequacy of data given the relatively small number of studies but the data is rich and nuanced in all 5 studies	Minor concerns over coherence given the range of beliefs and practices in different communities and countries	Moderate concerns over relevance as 5 of the 6 studies were conducted in LMIC's	Moderate	Although the data only comes from 6 studies the finding was assessed as moderate because the data is rich and, given the focus of the review, comes mainly from LMIC's (Bangladesh, Ghana, India and Nepal x2)
22	Fear of Childbirth - Women are scared of labour and birth and express their fears by highlighting the unpredictability of birth or the traumatic experiences of a previous birth. Although multiparous women may still hold a fear of birth they are less concerned in comparison to primiparous women who are more likely to fear the unknown	13 Studies - 2, 3, 6, 9, 10, 11, 13, 14, 17, 27, 33, 34, 37	Minor methodological limitations in 3/13 studies mainly concerning sampling strategy, data collection methods and data analysis	Rich data from a range of settings, contexts and sub-populations	Minor concerns around coherence given that multipara's seem less likely to fear childbirth than primipara's	Finding in accord with context of review question	High	Finding graded as high because of the range of studies, the richness of the data and the relative consistency of the finding in relation to the review question
23	Expect labour and birth to be painful - Women expect labour and birth to be painful and either express this realization directly or highlight their associated fear of the intensity of pain	7 Studies - 7, 9, 14, 18, 24, 33, 34	Minor methodological limitations in 2/7 studies around sampling, analysis of data and theme generation	Fairly rich data from a range of settings	Findings across studies are consistent and coherent.	Moderate concerns over relevance as there is no data from LMIC's	Moderate	Finding graded as moderate because of the limited number of studies and the lack of data from LMIC's
